# Supplementary material for: The influence of length of one-dimensional photoanode on the performance of dye-sensitized solar cells
Source: Royal Society of Chemistry journal article supplement (doi:10.1039/c2jm35413f), 2012-01-01
Supplement: c2jm35413f.pdf [file c2jm35413f.pdf]

## Supporting information

### **The influence of length of one-dimensional photoanode on the performance of dye-sensitized solar cells**

Liang-Yih Chen,\*<sup>a</sup> Yu-Tung Yin<sup>a</sup>

<sup>a</sup> *Department of Chemical Engineering, National Taiwan University of Science and Technology, 43, Section 4, Keelung Road, Taipei, 106, Taiwan*

Email for correspondence: sampras@mail.ntust.edu.tw

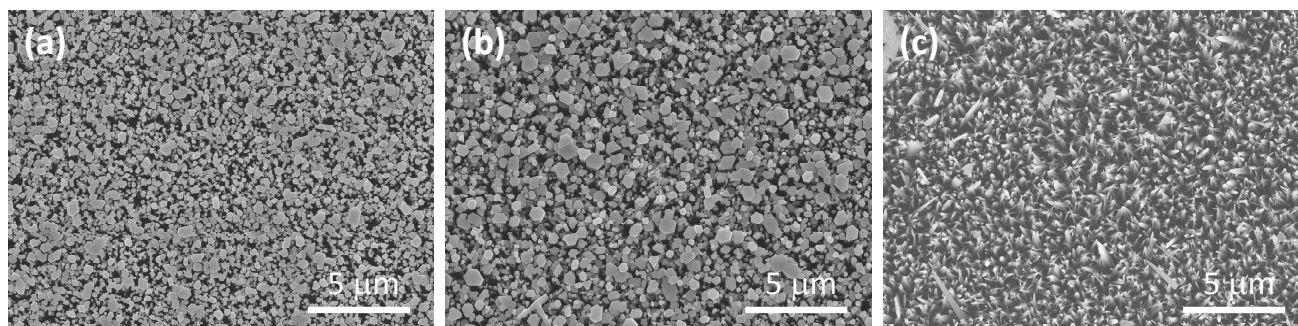

Fig. S1 The top-view SEM images of ZnO NWAs by using (a) multi-batch process (A1); (b) CFI process (A2) ; (c)NH<sub>3</sub>-assisted CFI process.

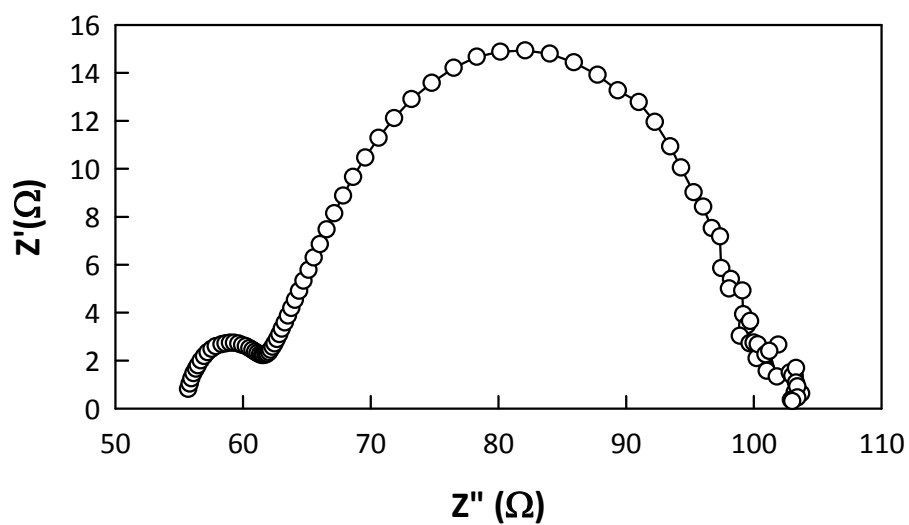

| <b>L (<math>\mu\text{m}</math>)</b> | <b><math>\tau_d</math> (ms)</b> | <b><math>\tau_n</math> (ms)</b> | <b><math>D_n</math> (<math>\text{cm}^2/\text{s}</math>)</b> | <b><math>L_n</math> (<math>\mu\text{m}</math>)</b> |
|-------------------------------------|---------------------------------|---------------------------------|-------------------------------------------------------------|----------------------------------------------------|
| 29.3                                | 0.78                            | 4.8                             | $1.10 \times 10^{-2}$                                       | 73                                                 |

Fig. S2 Nyquist plots of the impedance data of long ZnO-NWAs fabricated by  $\text{NH}_3$ -assisted CFI process.
